# Supplementary material for: A practical guide for the preparation of C1-labeled α-amino acids using aldehyde catalysis with isotopically labeled CO2
Source: Springer Nature journal article supplement (doi:10.1038/s41596-024-00974-4), 2024-03-28

# A practical guide for the preparation of C1-labeled $\alpha$ -amino acids using aldehyde catalysis with isotopically labeled CO<sub>2</sub>

In the format provided by the authors and unedited

## Contents

|      |                                                                                          |    |
|------|------------------------------------------------------------------------------------------|----|
| I.   | (±)-[1- <sup>13</sup> C]Phenylalanine HRMS Spectrum and Incorporation Calculation        | 2  |
| II.  | (±)-[1- <sup>11</sup> C]Phenylalanine Characterization Data and Additional Information   | 3  |
| III. | (±)-[1- <sup>14</sup> C]Phenylalanine Characterization Data                              | 8  |
| IV.  | References                                                                               | 9  |
| V.   | <sup>1</sup> H and <sup>13</sup> C NMR Spectra for (±)-[1- <sup>13</sup> C]Phenylalanine | 10 |

## I. (±)-[1-<sup>13</sup>C]Phenylalanine HRMS Spectrum and Incorporation Calculation

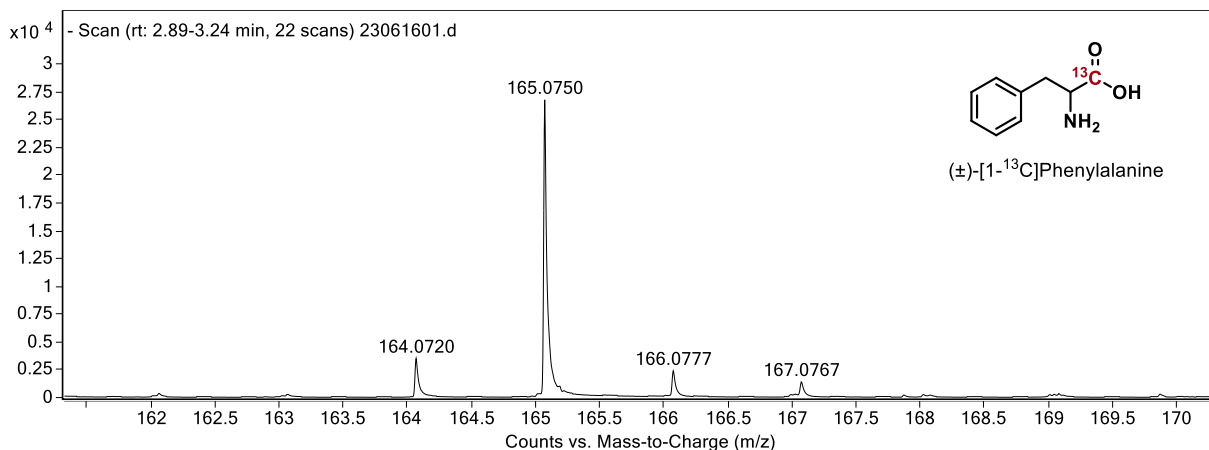

| m/z       | Relative Natural Abundance (%) | Observed Abundance (%) | Corrected Abundance (%) | Isotopic Enrichment Relative (%) |
|-----------|--------------------------------|------------------------|-------------------------|----------------------------------|
| [M-H] + 0 | 100                            | 3501                   | 3501                    | 12                               |
| [M-H] + 1 | 10.29                          | 26785                  | 26425                   | <b>88</b>                        |

**Determination of <sup>13</sup>C Incorporation:** Percent <sup>13</sup>C isotope incorporation was determined by comparison of the mass spectral patterns of carbon-13 labelled product versus authentic starting material and calculated by the expressions below.

**% <sup>13</sup>C Incorp.** = [(Corrected abundance of <sup>13</sup>C) / (Corrected abundance of <sup>13</sup>C + Observed abundance of <sup>12</sup>C)] × 100, where observed abundance of <sup>12</sup>C is obtained from the mass signal intensities at M (m/z);

**Corrected Abundance of <sup>13</sup>C** = Observed abundance of <sup>13</sup>C – (Observed abundance of <sup>12</sup>C × Relative Natural Abundance of <sup>13</sup>C / 100), where observed abundance of <sup>13</sup>C is obtained from the mass signal intensities at M+1 (m/z).

### Representative Example (Phenylalanine):

Corrected abundance of <sup>13</sup>C of phenylalanine = 26785 – [(3501 × 10.29) / 100] = 26425

% <sup>13</sup>C incorp. of phenylalanine = [26425 / (26425 + 3501)] × 100 = **88%**

## II. (±)-[1-<sup>11</sup>C]Phenylalanine Characterization Data and Additional Information

### Radiochemical Yield and Quality Control

Radiochemical product identity was confirmed by co-injection of the labelled compound and corresponding non-radioactive standard. Radiochemical purity (RCP) was determined by calculating the ratio of the decay-corrected product signal area over the sum of all signal areas on the radio-HPLC chromatogram. Trapping efficiency (TE) was determined by measuring the activity remaining in the reaction vessel at the end of the reaction (after bubbling helium for 1 min), correcting it for decay and calculating the ratio over the starting activity value. Radiochemical yield (RCY) was calculated as the product of RCP and TE values.

### Radiolabelling Experimental Data

Grey and red arrows indicate peaks identified as the title compound in the UV and radiation chromatograms, respectively, based on co-elution with nonradioactive standards. As detectors are connected in series, there remains an uncorrected delay between signals in the UV and radiation chromatograms.

### (±)-[1-<sup>11</sup>C]Phenylalanine Crude Reaction Radio-HPLC Analysis

Column: Phenomenex Aqua C18, 4.6 × 250 mm, 5 μm, 125 Å pore size

TE = 25%; RCP = 95%; RCY = 24% (n = 3)

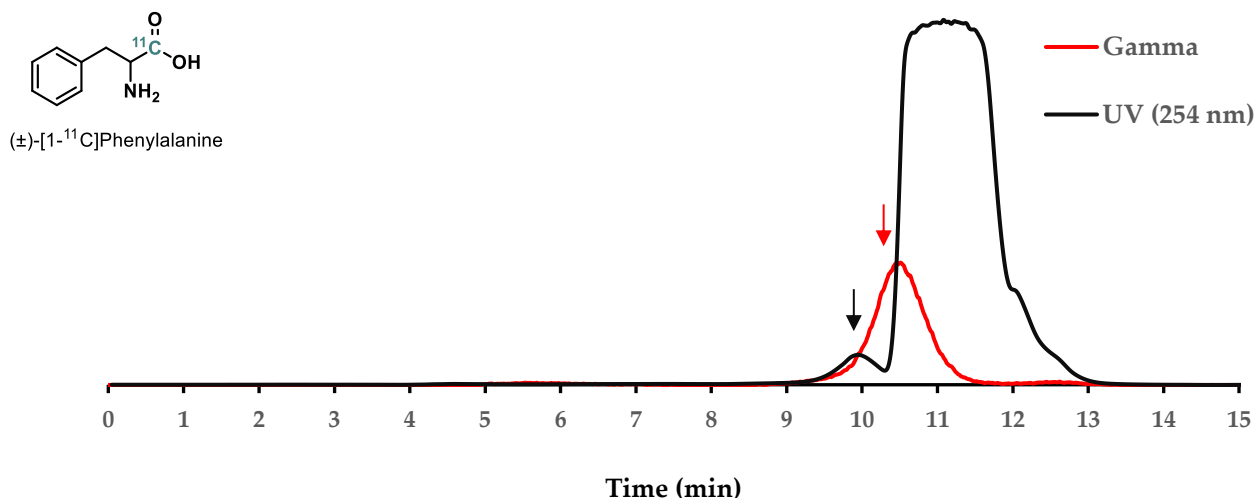

## (±)-[1-<sup>11</sup>C]Phenylalanine Isolation Radio-HPLC Analysis

Column: Phenomenex Synergi Hydro-RP, 4.6 × 250 mm, 10 μm, 80 Å pore size

TE = 45%; RCP = 30%; RCY = 13%

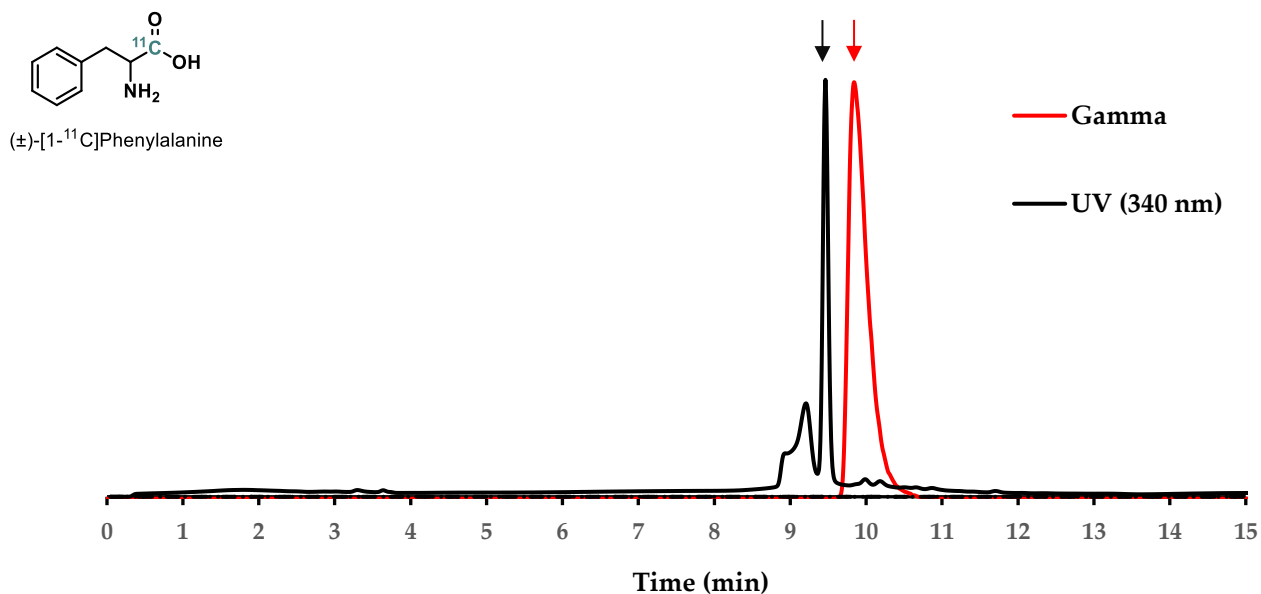

|                        |            |                                     |
|------------------------|------------|-------------------------------------|
| Starting activity      | 12.7 GBq   | @ 16:34                             |
| Activity in reactor    | 5.55 GBq   | @ 16:35 (5.74 GBq @ 16:34; 45% TE)  |
| Product activity       | 0.69 GBq   | @ 17:00 (1.66 GBq @ 16:34; 13% RCY) |
| Activity concentration | 107 MBq/mL | @ 17:11 (156 MBq @ 17:00)           |
| Injection volume       | 50 μL      |                                     |
| Activity injected      | 5.36 MBq   | @ 17:11 (7.79 MBq @ 17:00)          |

## (±)-[1-<sup>11</sup>C]Phenylalanine Isolation Calibration Curve

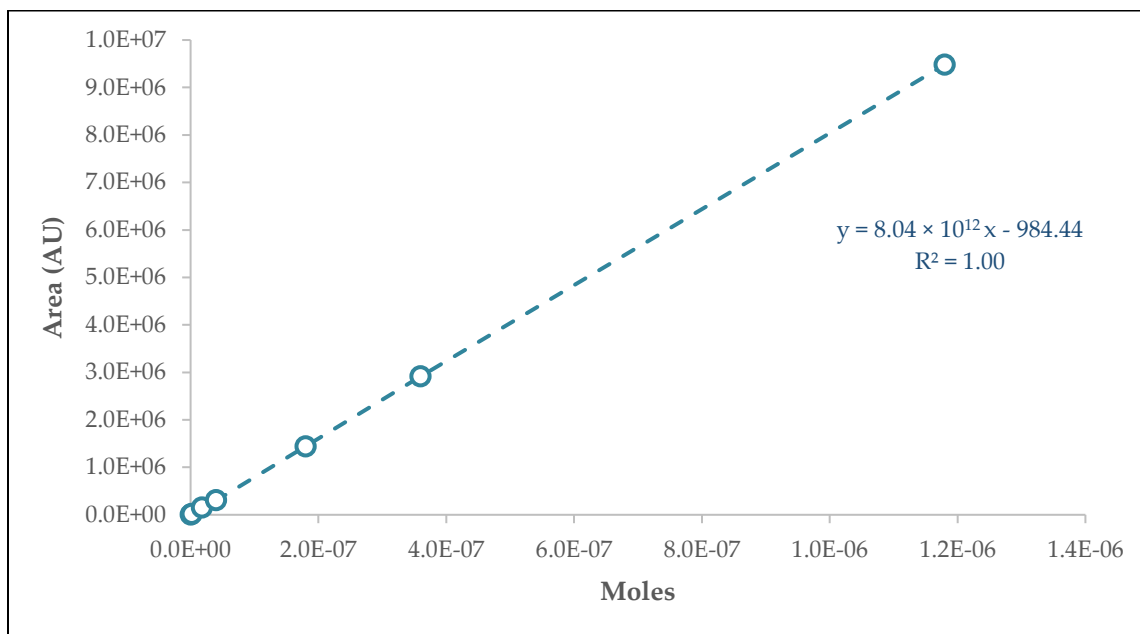

|                      |                                      |         |
|----------------------|--------------------------------------|---------|
| UV area              | $7.34 \times 10^6$ AU                |         |
| Calibration equation | $y = 8.04 \times 10^{12} x - 984.44$ |         |
| n (moles)            | 0.913 $\mu$ mol                      |         |
| Molar activity       | 8.4 GBq/mmol                         | @ 17:00 |

## Additional Details on Radiochemical Yield Determinations

### Decay Correction Formula for Carbon-11:

$$A = A_0 \times e^{\left(\frac{\ln 2}{20.364}\right) \times (t - t_0)}$$

where:

$A_0$  is activity at reference time

$A$  is activity at measurement time

$(t - t_0)$  is the interval between measurement time and reference time in minutes

20.364 is the half-life of carbon-11 in minutes

## Trapping Efficiency Calculation (Using (±)-[1-<sup>11</sup>C]Tryptophan as an Example)<sup>[1]</sup>:

Note: this data was collected from the key reference using this protocol. It will be used as the detailed example to illustrate trapping efficiency, radiochemical purity, and radiochemical yield calculations.

Column: Phenomenex Aqua C18, 4.6 × 250 mm, 5 μm, 125 Å pore size

TE = 18%; RCP = 91%; RCY = 16% (n = 2)

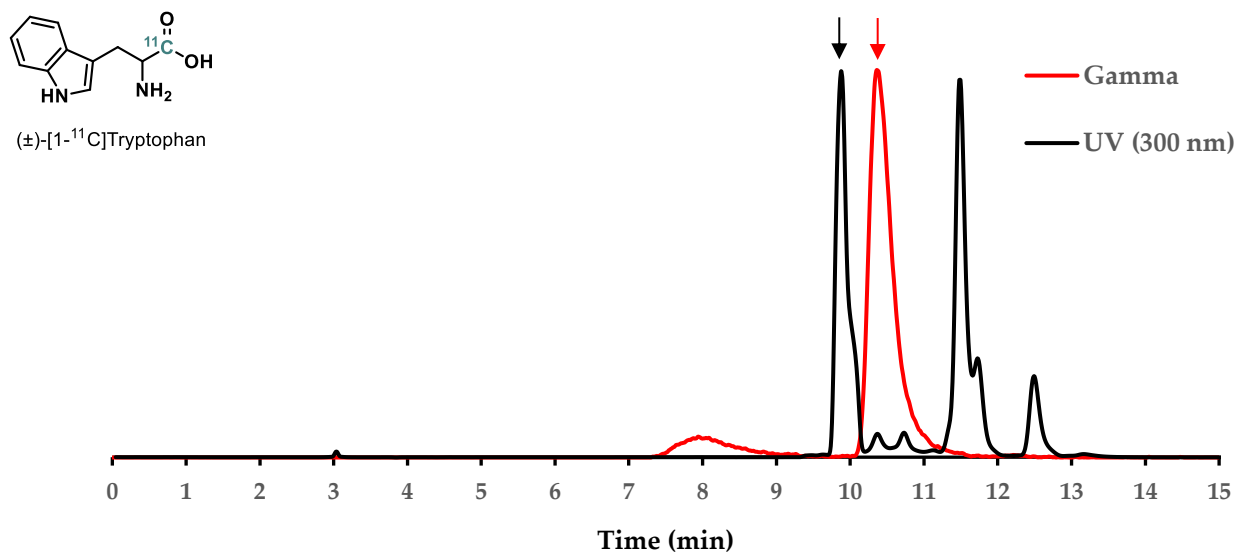

|                                                  |                    |   |       |
|--------------------------------------------------|--------------------|---|-------|
| [ <sup>11</sup> C]CO <sub>2</sub> trap activity: | 115 mCi (4255 MBq) | @ | 14:39 |
| Reactor activity at the end of the reaction:     | 9.5 mCi (352 MBq)  | @ | 15:01 |
| Decay-corrected reactor activity:                | 20 mCi (740 MBq)   | @ | 14:39 |

$$\begin{aligned}\text{TE} &= (\text{decay corrected reactor activity} / \text{trap activity}) \times 100 \\ &= (20 \text{ mCi} / 115 \text{ mCi}) \times 100\% \\ &= 17\%\end{aligned}$$

### Radiochemical Purity Calculation:

Radio-HPLC integrations:

| Elution time (min)  | Area (AU) | Decay-corrected area (AU) <sup>†</sup> |
|---------------------|-----------|----------------------------------------|
| 8.418               | 86386     | 115091                                 |
| 10.407 <sup>‡</sup> | 799087    | 1139283                                |
| 12.206              | 4118      | 6242                                   |

<sup>†</sup>Corrected to time of injection (14:44). <sup>‡</sup>[<sup>11</sup>C]Tryptophan.

$$\begin{aligned}\text{RCP} &= (\text{decay corrected product area} / \text{sum of decay corrected areas}) \times 100 \\ &= [1139283 / (115091 + 1139283 + 6242)] \times 100 \\ &= 90\%\end{aligned}$$

### Radiochemical Yield Calculation:

$$\begin{aligned}\text{RCY} &= \text{TE} \times \text{RCP} \\ &= (17 \times 90) / 100 \\ &= 15\%\end{aligned}$$

### Average Values:

|     | Run 1 | Run 2 | Average |
|-----|-------|-------|---------|
| TE  | 17%   | 19%   | 18%     |
| RCP | 90%   | 91%   | 91%     |
| RCY | 15%   | 17%   | 16%     |



### III. (±)-[1-<sup>14</sup>C]Phenylalanine Characterization Data

#### Radio-HPLC Detection: After Reaction Before Purification

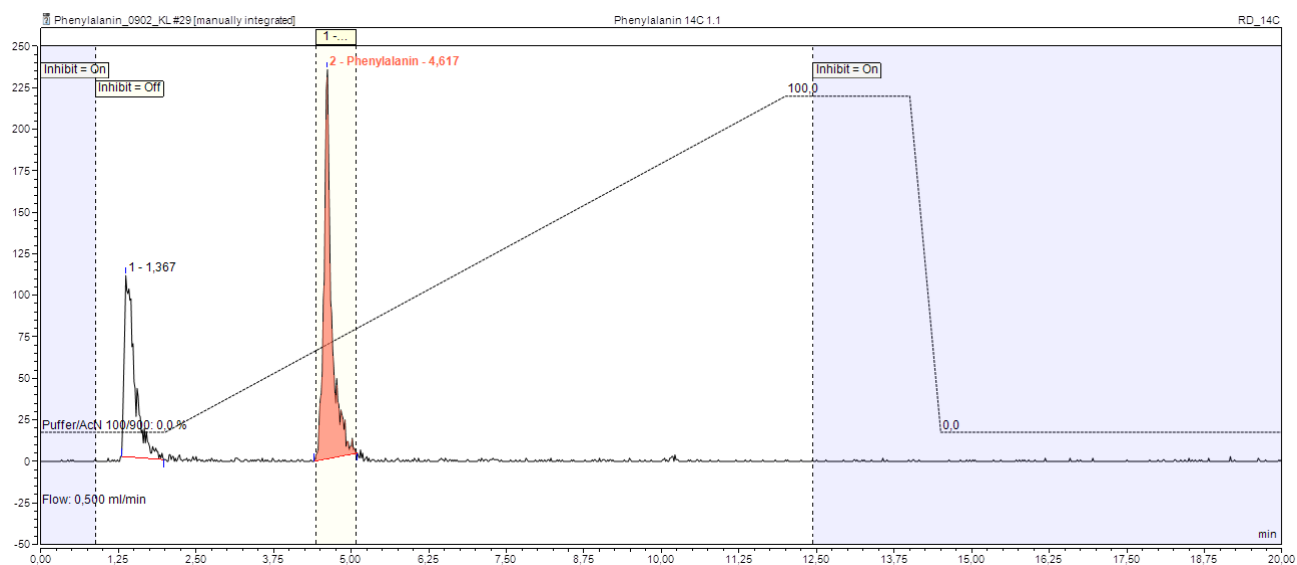

#### Radio-HPLC Detection: After Purification

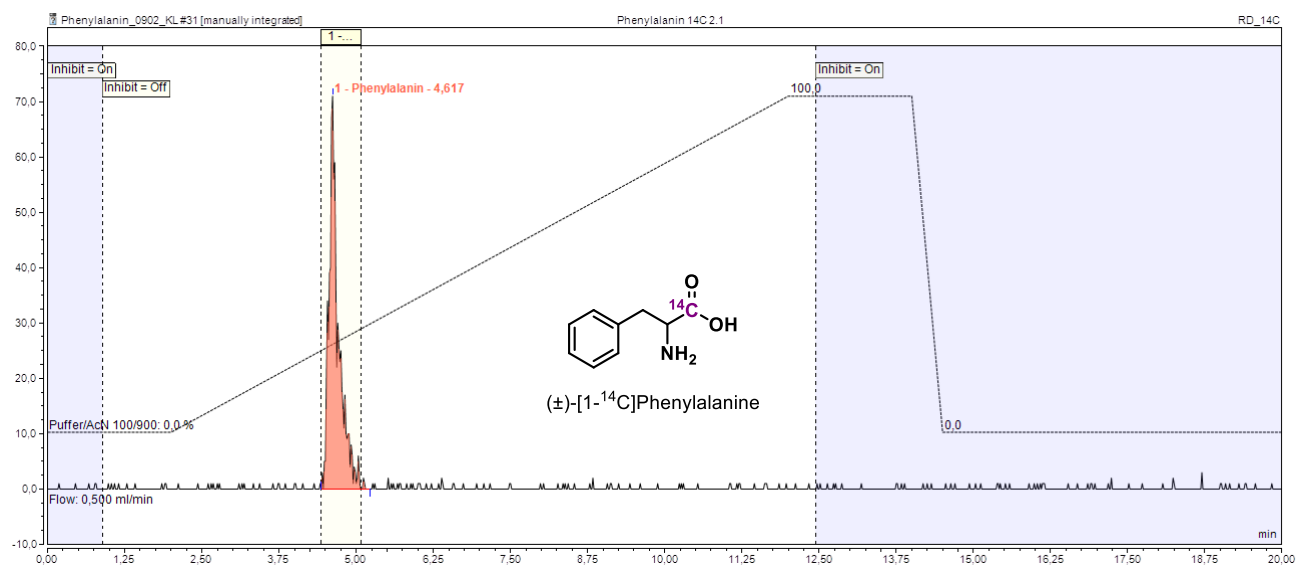

## HRMS and Activity Data for (±)-[1-<sup>14</sup>C]Phenylalanine

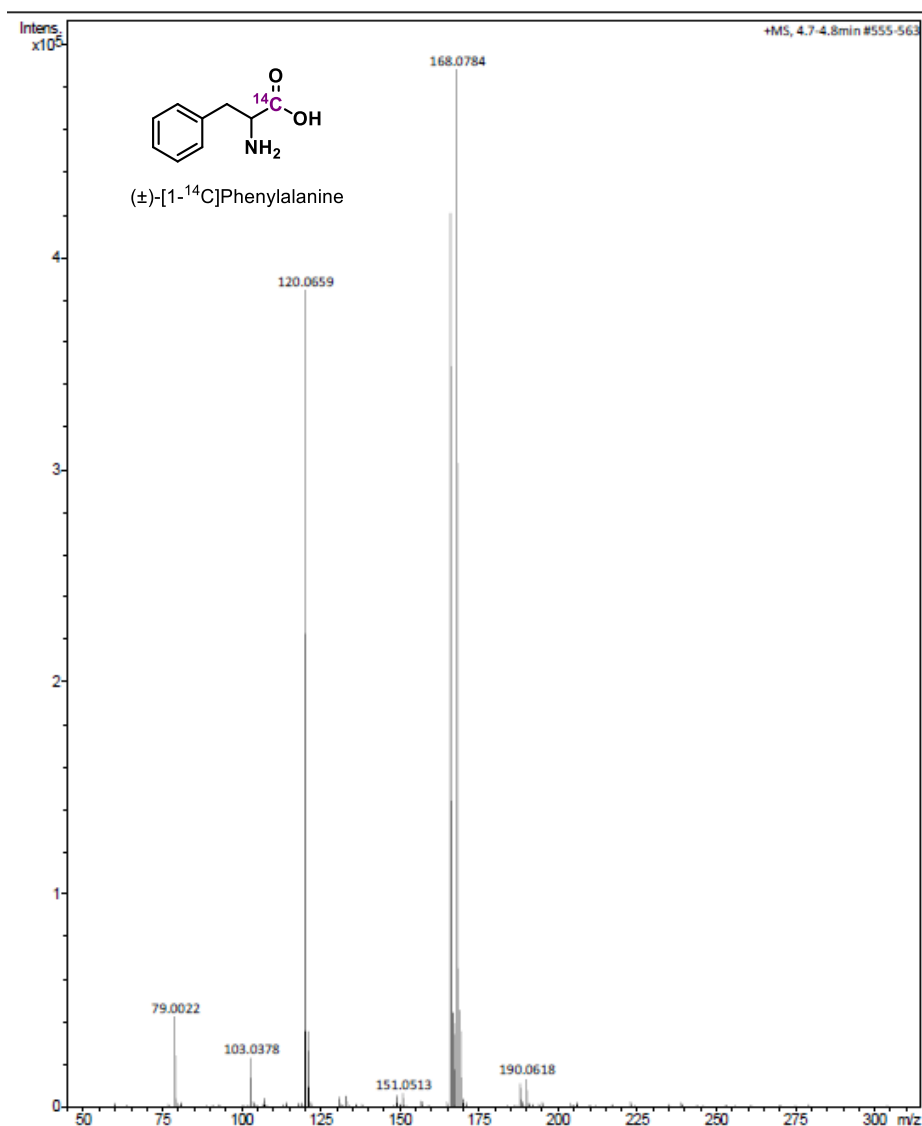

46,5 % 0 <sup>14</sup>C  
53,6 % 1 <sup>14</sup>C

→

x

62,5 Ci/mmol

→

33,5 mCi/mmol

## IV. References

- [1] Bsharat, O.; Doyle, M. G. J.; Munch, M.; Mair, B. A.; Cooze, C. J. C.; Derdau, V.; Bauer, A.; Kong, D.; Rotstein, B. H.; Lundgren, R. J. Aldehyde-catalyzed carboxylate exchange in  $\alpha$ -amino acids with isotopically labelled CO<sub>2</sub>. *Nat. Chem.* **2022**, *14*, 1367–1374.

V.  $^1\text{H}$  and  $^{13}\text{C}$  NMR Spectra for  $(\pm)$ - $[1-^{13}\text{C}]$ Phenylalanine

Department of Chemistry, University of Alberta

OpenVnmrj

Recorded on: **u500, Jun 16 2023** Sweep Width (Hz): **6009.62** Acquisitor Time (s): **3** Relaxation Delay (s): **2**  
 Pulse Sequence: **FRESAT** Digital Res. (Hz/pt): **0.09** Hz per mm (Hz/mm): **18.74** Completed Scans **8**

Michael, MD-06-45  
 499.788 MHz HI ID in d2o (ref. to external acetone @ 2.225 ppm) temp 27.7 C -> actual temp = 27.0 C, cold dual probe

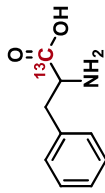

$(\pm)$ - $[1-^{13}\text{C}]$ Phenylalanine

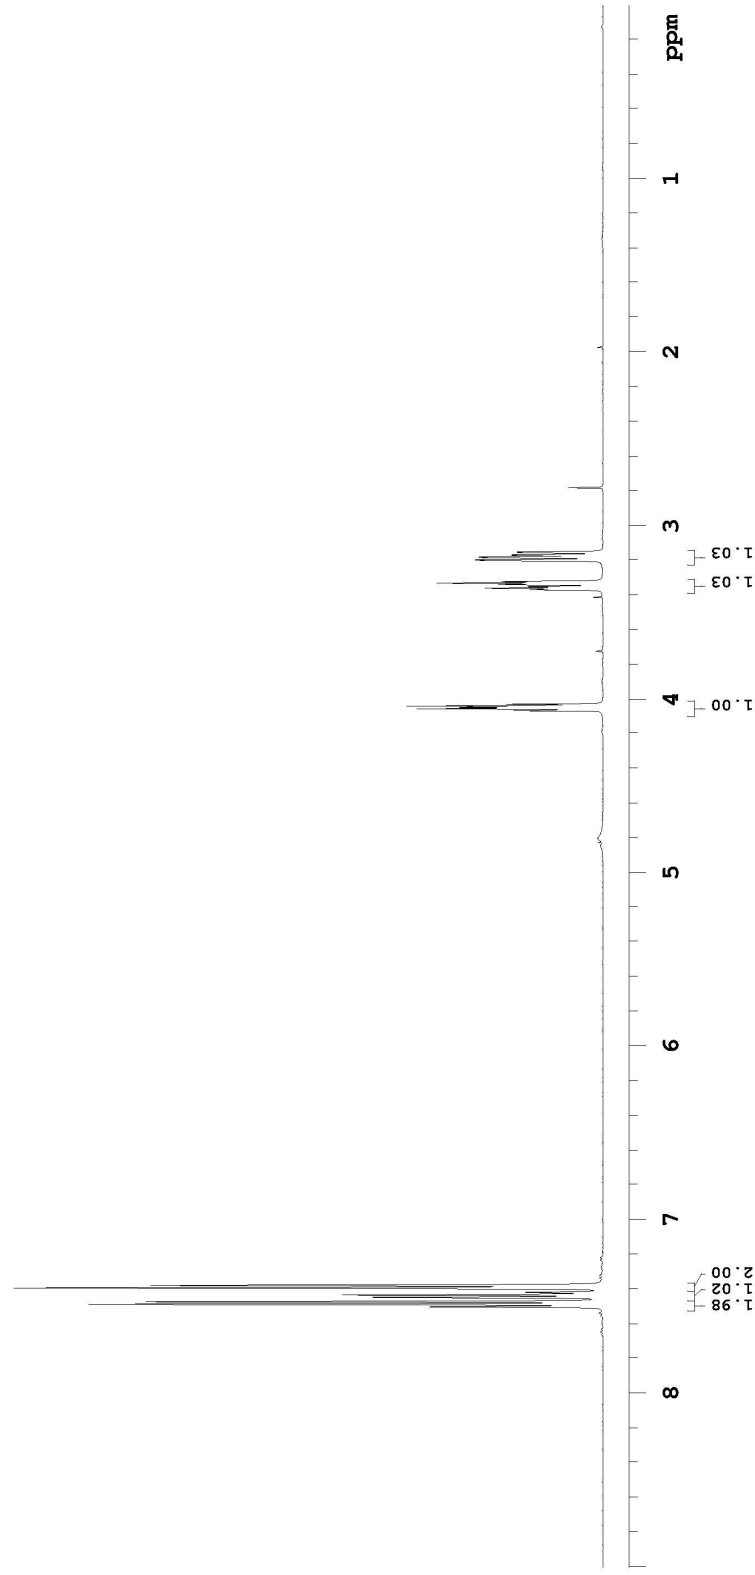

# OpenVnmrj

Recorded on: **u500, Jun 16 2023** Sweep Width (Hz): **33783.8** Acquisition Time (s): **1** Relaxation Delay (s): **1**  
Pulse Sequence: **s2pul** Digital Res. (Hz/pt): **0.26** Hz per mm (Hz/mm): **109.95** Completed Scans **512**

Michael, MD-06-41  
125.686 MHz C13{H1} 1D in d2o (ref. to external acetone @ 31.07 ppm) temp 27.7 C -> actual temp = 27.0 C, coldddual probe

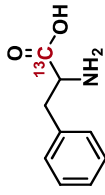

(±)-[1-<sup>13</sup>C]Phenylalanine

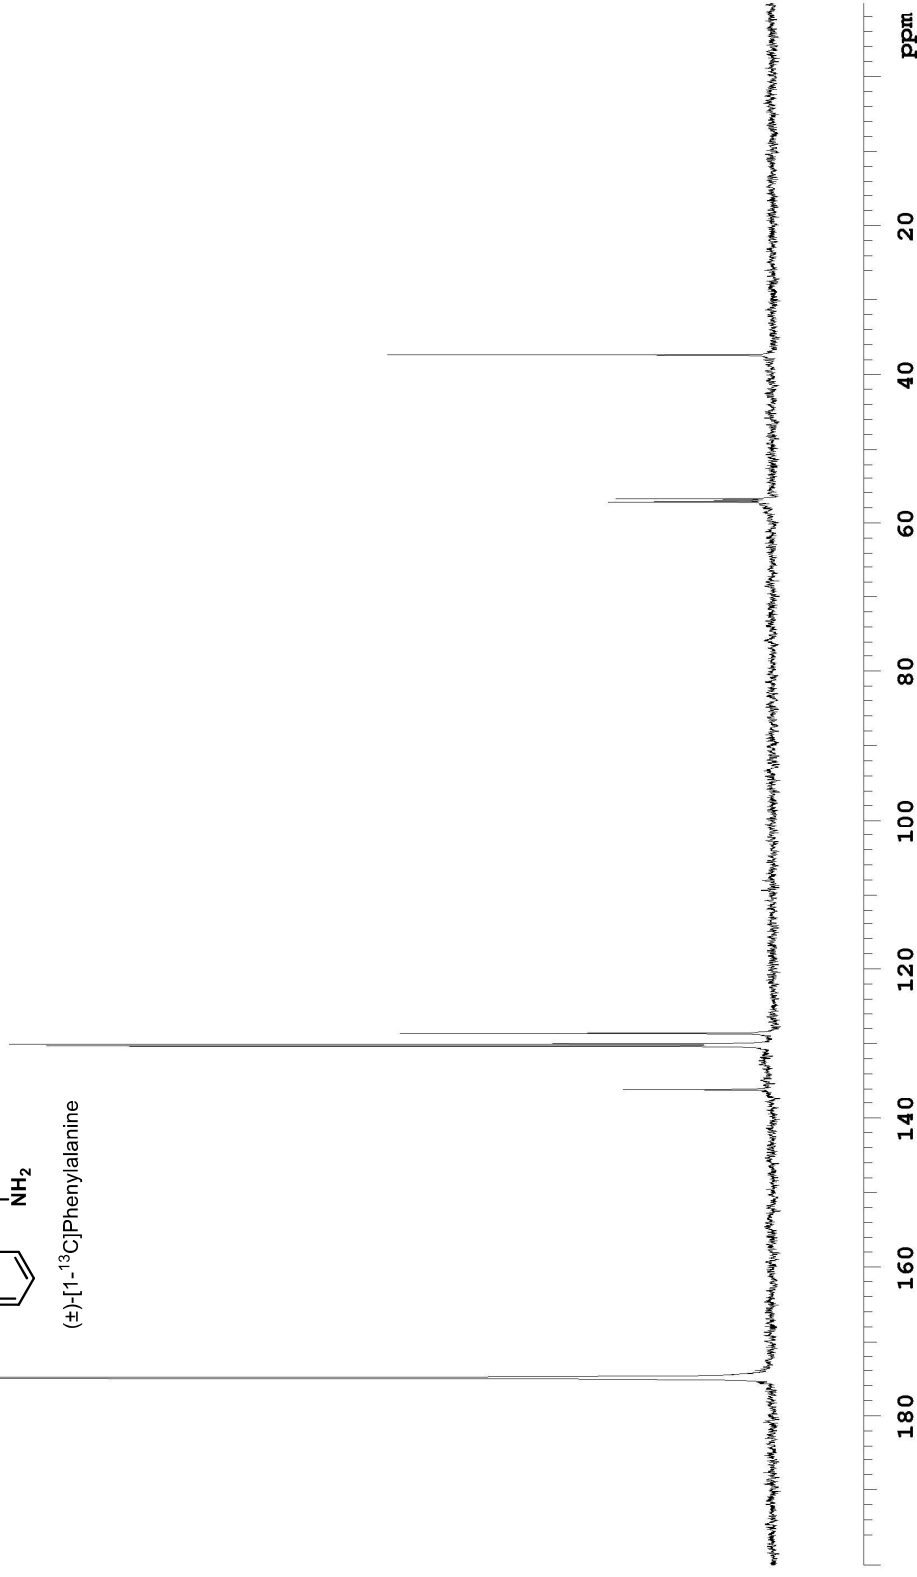

Supplement: MOESM1 [file 41596_2024_974_MOESM1_ESM11.pdf]
